# Supplementary material for: Airway Administration of Bacterial Lysate OM-85 Protects Mice Against Respiratory Syncytial Virus Infection
Source: PubMed Central journal article supplement (PMC9118194; doi:10.3389/fimmu.2022.867022), 2022-05-05
Supplement: DataSheet_1.pdf [file DataSheet_1.pdf]

## Supplementary Material

### 1 Supplementary Table

Supplementary Table 1. Gene ID description

| Gene name            | Gene ID       | Species |
|----------------------|---------------|---------|
| <i>Actb</i>          | Mm02619580_g1 | Mouse   |
| <i>Tnfa</i>          | Mm00443258_m1 | Mouse   |
| <i>Il1b</i>          | Mm00434228_m1 | Mouse   |
| <i>Ifng</i>          | Mm01168134_m1 | Mouse   |
| <i>Il4</i>           | Mm00445259_m1 | Mouse   |
| <i>Il6</i>           | Mm00446190_m1 | Mouse   |
| <i>Cxcl15</i> (IL-8) | Mm00441263_m1 | Mouse   |
| <i>Il10</i>          | Mm01288386_m1 | Mouse   |
| <i>Ifnb1</i>         | Mm00439552_s1 | Mouse   |
| <i>Isg15</i>         | Mm01705338_s1 | Mouse   |
| <i>Ddx58</i> (RIG-I) | Mm01216853_m1 | Mouse   |
| <i>ACTB</i>          | Hs01060665_g1 | Human   |
| <i>IFNB1</i>         | Hs01077958_s1 | Human   |
| <i>ISG15</i>         | Hs01921425_s1 | Human   |

|                     |               |       |
|---------------------|---------------|-------|
| <i>IFIH1</i> (MDA5) | Hs00223420_m1 | Human |
|---------------------|---------------|-------|

|              |               |       |
|--------------|---------------|-------|
| <i>DDX58</i> | Hs01061436_m1 | Human |
|--------------|---------------|-------|

---

## 2. Supplementary Figures

### A Th1 response – gating strategy

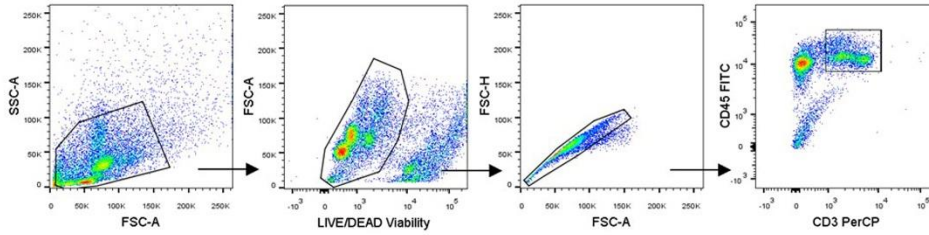

### B Th2 response – gating strategy

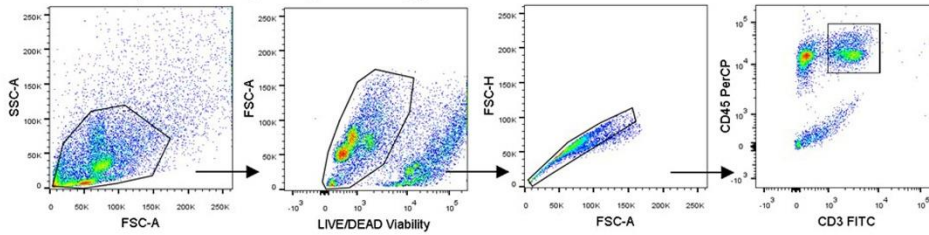

### C Treg response – gating strategy

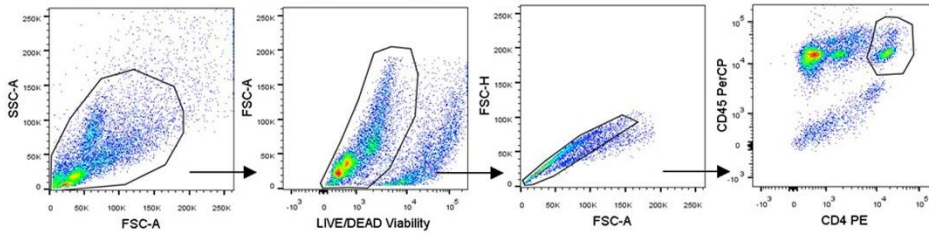

### D ILC2 response – gating strategy

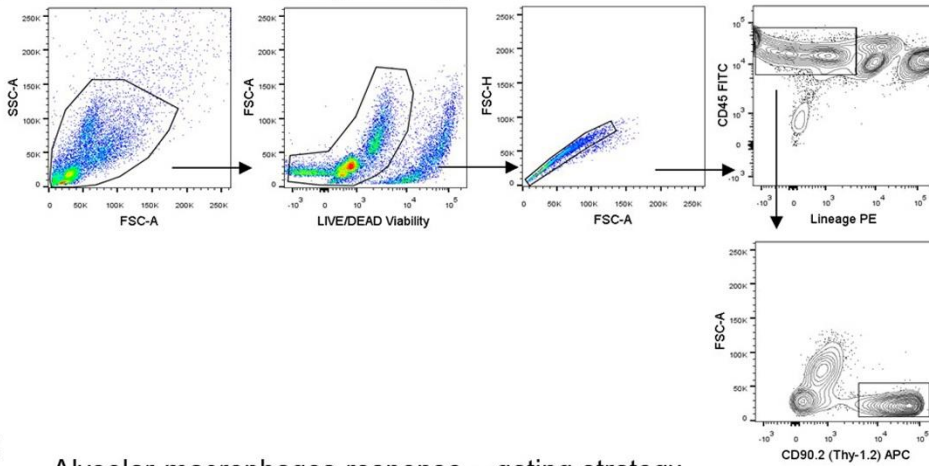

### E Alveolar macrophages response – gating strategy

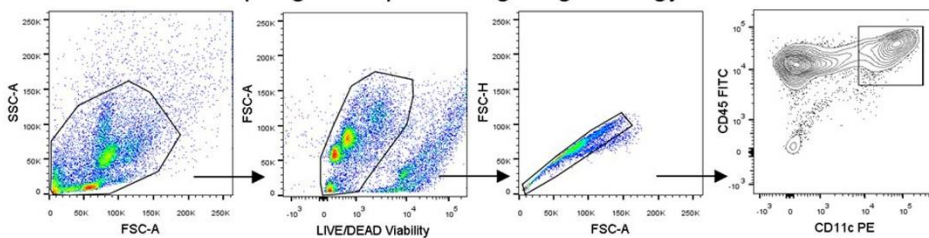

**Supplementary Figure 1. Gating strategy of each immune cell population. (A)** Gating strategy of Th1 lymphocytes. **(B)** Gating strategy of Th2 lymphocytes. **(C)** Gating strategy of Treg lymphocytes. **(D)** Gating strategy of ILC2. **(E)** Gating strategy of alveolar macrophages.

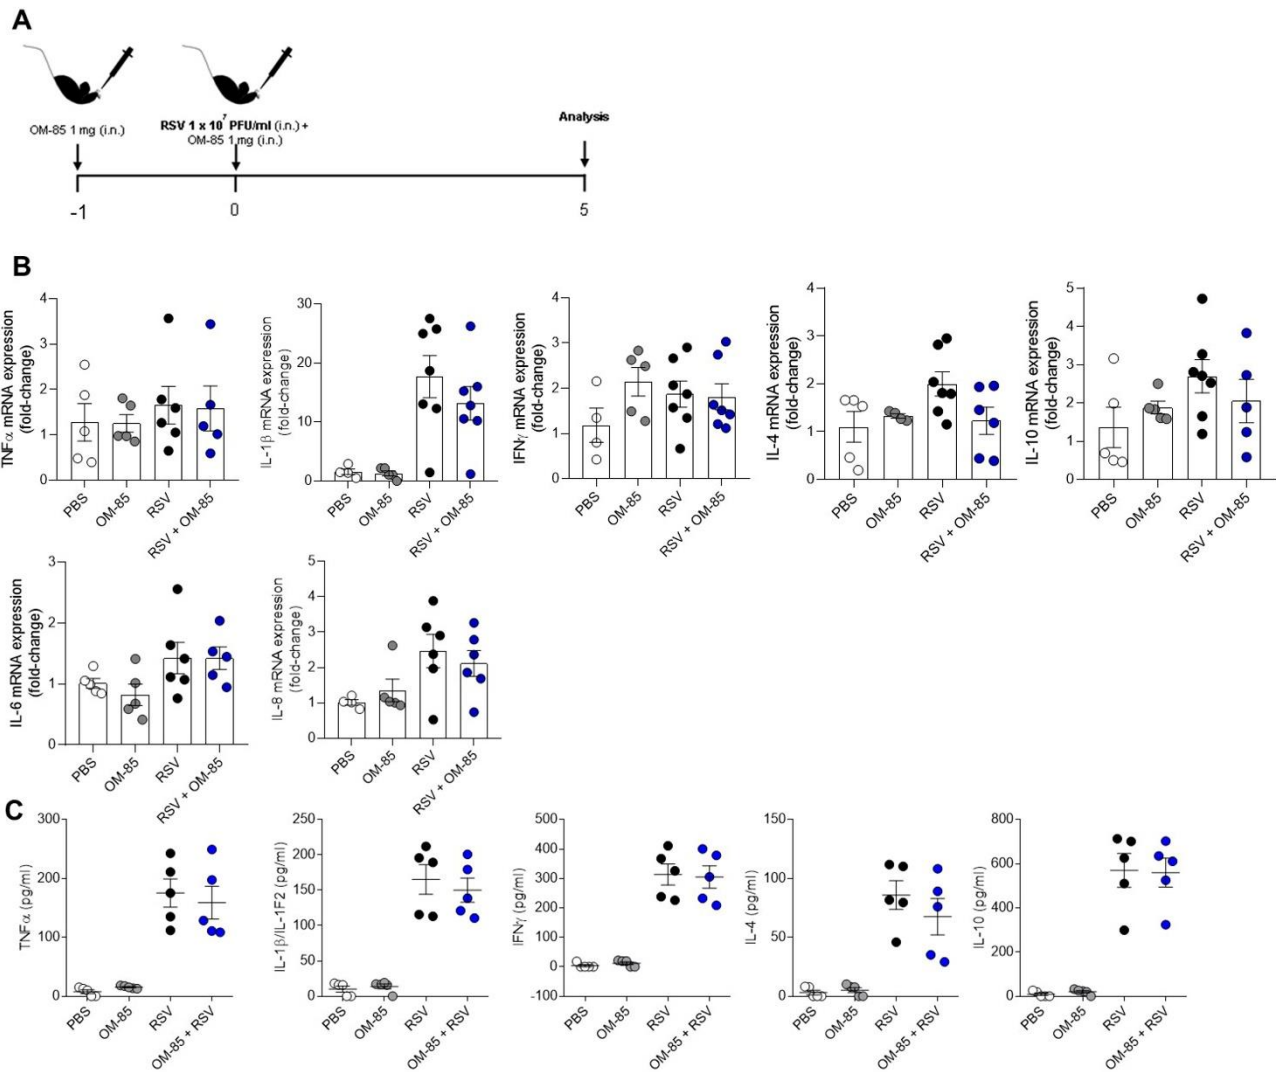

**Supplementary Figure 2. Short-time preventive treatment with OM-85 does not modulate cytokine production in the lungs during RSV infection.** Mice were treated intranasally with OM-85 (1mg) 1 day prior to RSV infection. Afterwards, mice were infected with RSV ( $1 \times 10^7$  PFU/ml) and received another OM-85 boost 6h later. BAL and lung were harvested at day 5 post-infection. **(A)** Experimental design. **(B)** *Tnfa*, *Il1b*, *Ifng*, *Il4*, *Il10*, *Il6* and *Cxcl15* (IL-8) gene expression in the lungs detected by real-time PCR (fold change compared to untreated/uninfected control). **(C)** Production of TNF $\alpha$ , IL-1 $\beta$ , IFN $\gamma$ , IL-4 and IL-10 in the lungs measured by ELISA. All data are expressed as mean  $\pm$  SEM. Multiple groups were compared using Kruskal–Wallis.

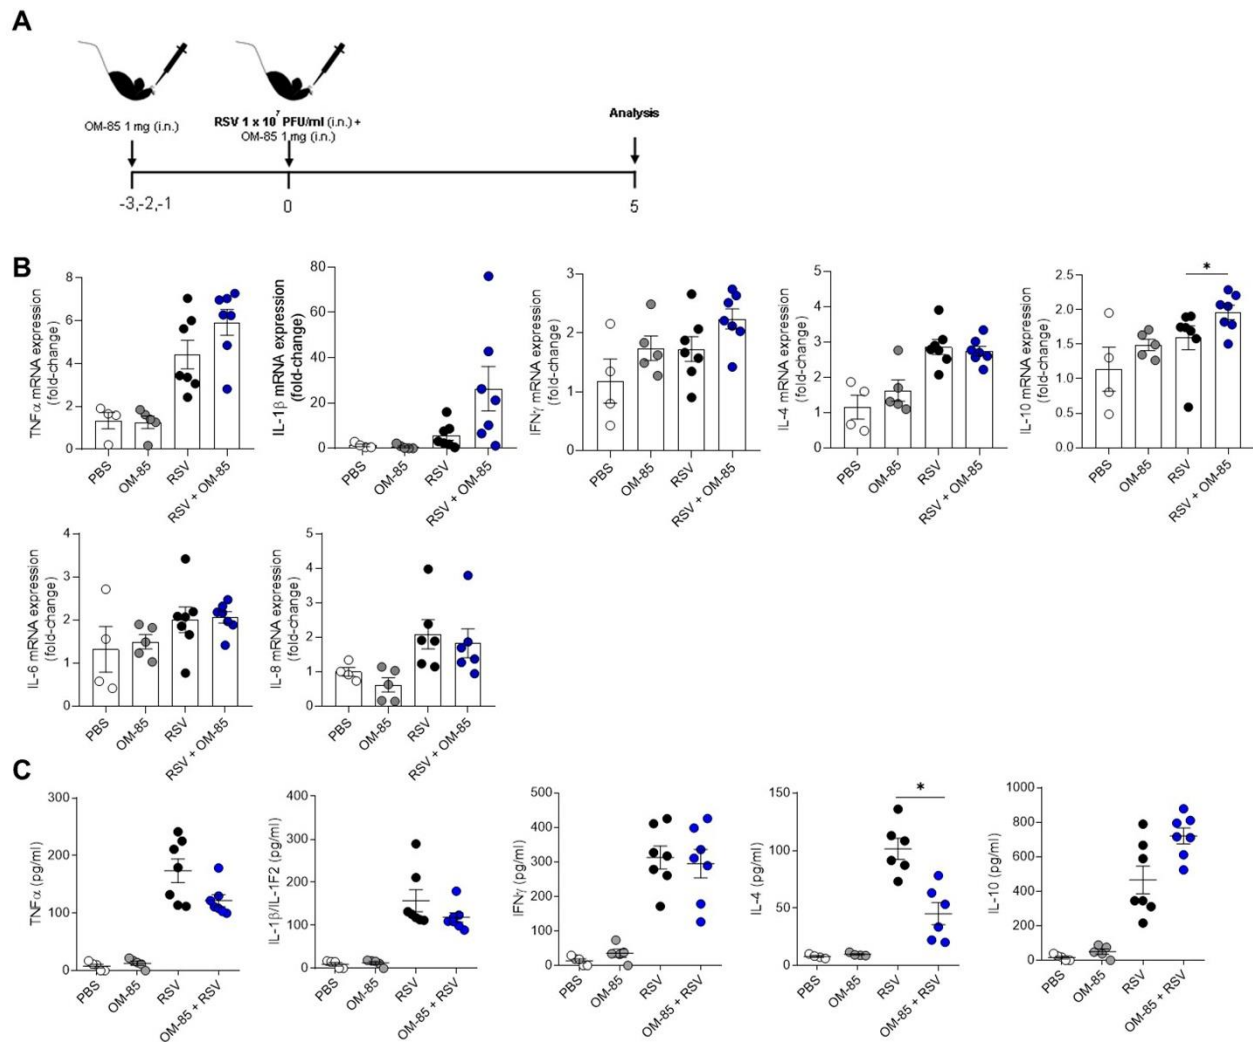

**Supplementary Figure 3. OM-85 pretreatment starting 3 days prior to modulates IL-4 and IL-10 production in the lungs during RSV infection.** Mice were treated intranasally with OM-85 (1mg) 3 days prior to RSV infection. Afterwards, mice were infected with RSV ( $1 \times 10^7$  PFU/ml) and received another OM-85 boost 6h later. BAL and lung were harvested at day 5 post-infection. **(A)** Experimental design. **(B)** *Tnfa*, *Il1b*, *Ifng*, *Il4*, *Il10*, *Il6* and *Cxcl15* (IL-8) gene expression in the lungs detected by real-time PCR (fold change compared to untreated/uninfected control). **(C)** Production of TNF $\alpha$ , IL-1 $\beta$ , IFN $\gamma$ , IL-4 and IL-10 in the lungs measured by ELISA. All data are expressed as mean  $\pm$  SEM. Multiple groups were compared using Kruskal–Wallis. \* $p < 0.05$ .

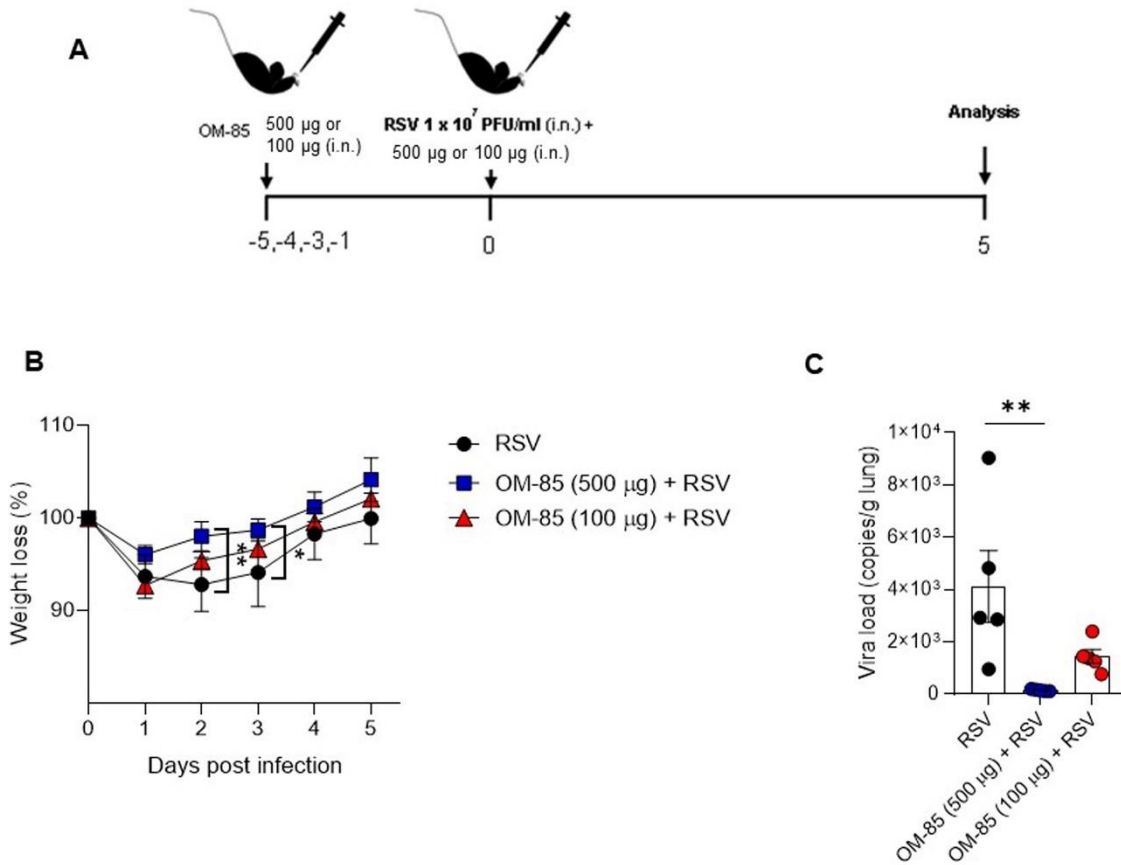

**Supplementary Figure 4. OM-85 pretreatment protects against RSV infection in a dose-dependent manner.** Mice were treated intranasally with OM-85 (1mg) 5 days prior to RSV infection. Afterwards, mice were infected with RSV ( $1 \times 10^7$  PFU/ml) and received another OM-85 boost 6h later. **(A)** Experimental design. **(B)** Percentage of weight loss relative to day 0 (right before infection). **(C)** RSV viral load detected in lung tissue by real-time PCR (viral copies/g of lung tissue). All data are expressed as mean  $\pm$  SEM. Multiple groups were compared using Kruskal–Wallis. \*\* $p < 0.01$ , \*\*\* $p < 0.001$ .

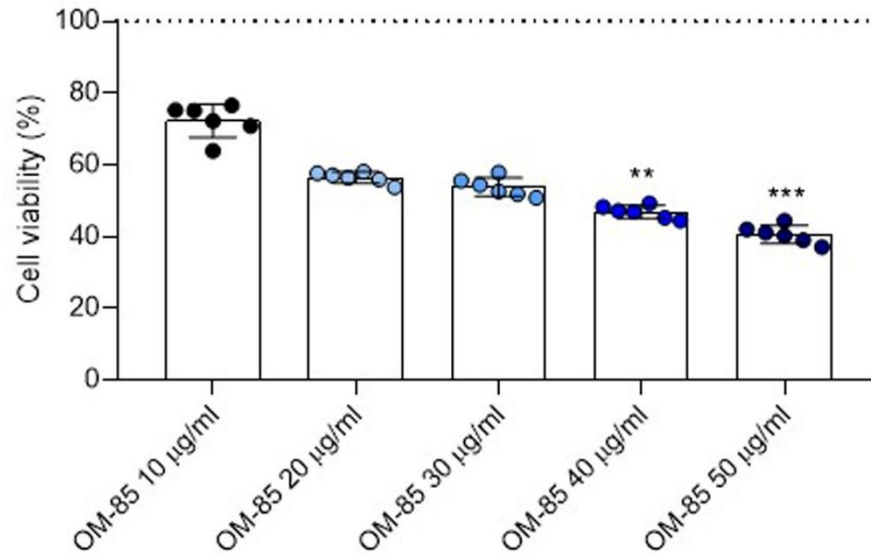

Fitted line represents Control (100% of cell viability)

\* vs Control

**Supplementary Figure 5. *In vitro* OM-85 toxicity assay.** Mycoplasma-free A549 cells ( $8 \times 10^4$  cells/ml) were treated with different concentrations of OM-85 for 96h. Cell viability was assessed by MTT assay using untreated control as 100% of viability. All data are expressed as mean  $\pm$  SEM. Multiple groups were compared using Kruskal–Wallis. \*\* $p < 0.01$ , \*\*\* $p < 0.001$ .
